# Supplementary material for: Vacancy diffusion barriers in TaON and Ta3N5 water-splitting photocatalysts
Source: Royal Society of Chemistry journal article supplement (doi:10.1039/c9ta02280e), 2019-01-01
Supplement: c9ta02280e1.pdf [file c9ta02280e1.pdf]

## Supporting Information

### **Vacancy Diffusion Barriers in TaON and Ta<sub>3</sub>N<sub>5</sub> Water-Splitting Photocatalysts**

*Joshua J. Brown,<sup>1</sup> Alister J. Page<sup>1\*</sup>*

<sup>1</sup>Priority Research Centre for Frontier Energy Technology and Utilisation, The University of  
Newcastle, Callaghan 2308, NSW, Australia

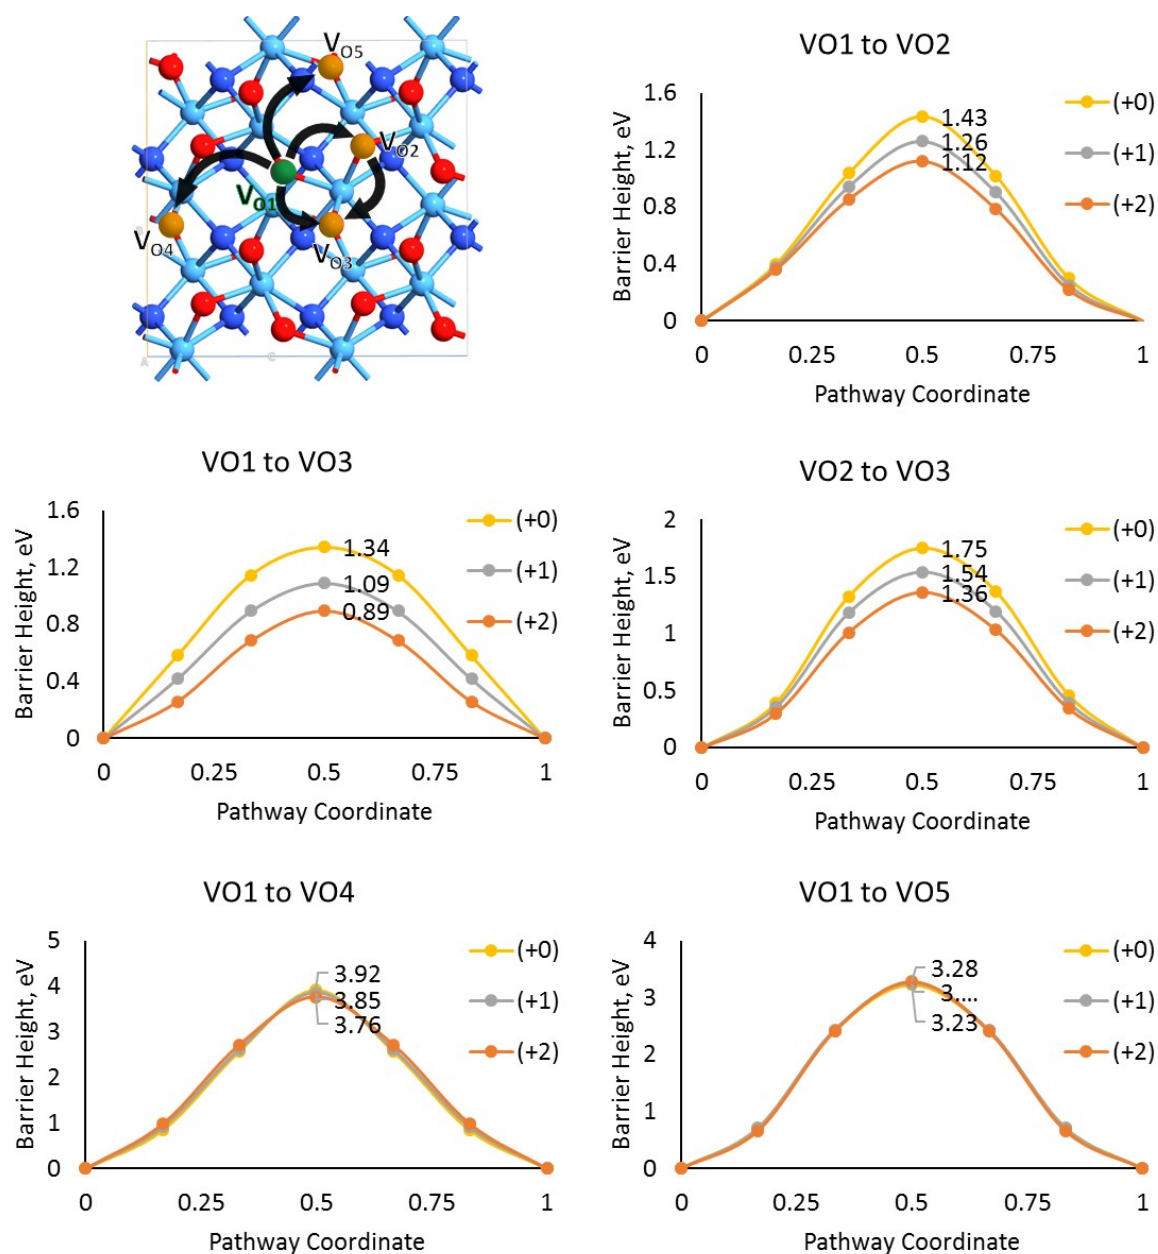

**Figure S1.** NEB Pathways corresponding to diffusion barriers reported in Figure 2.(a).

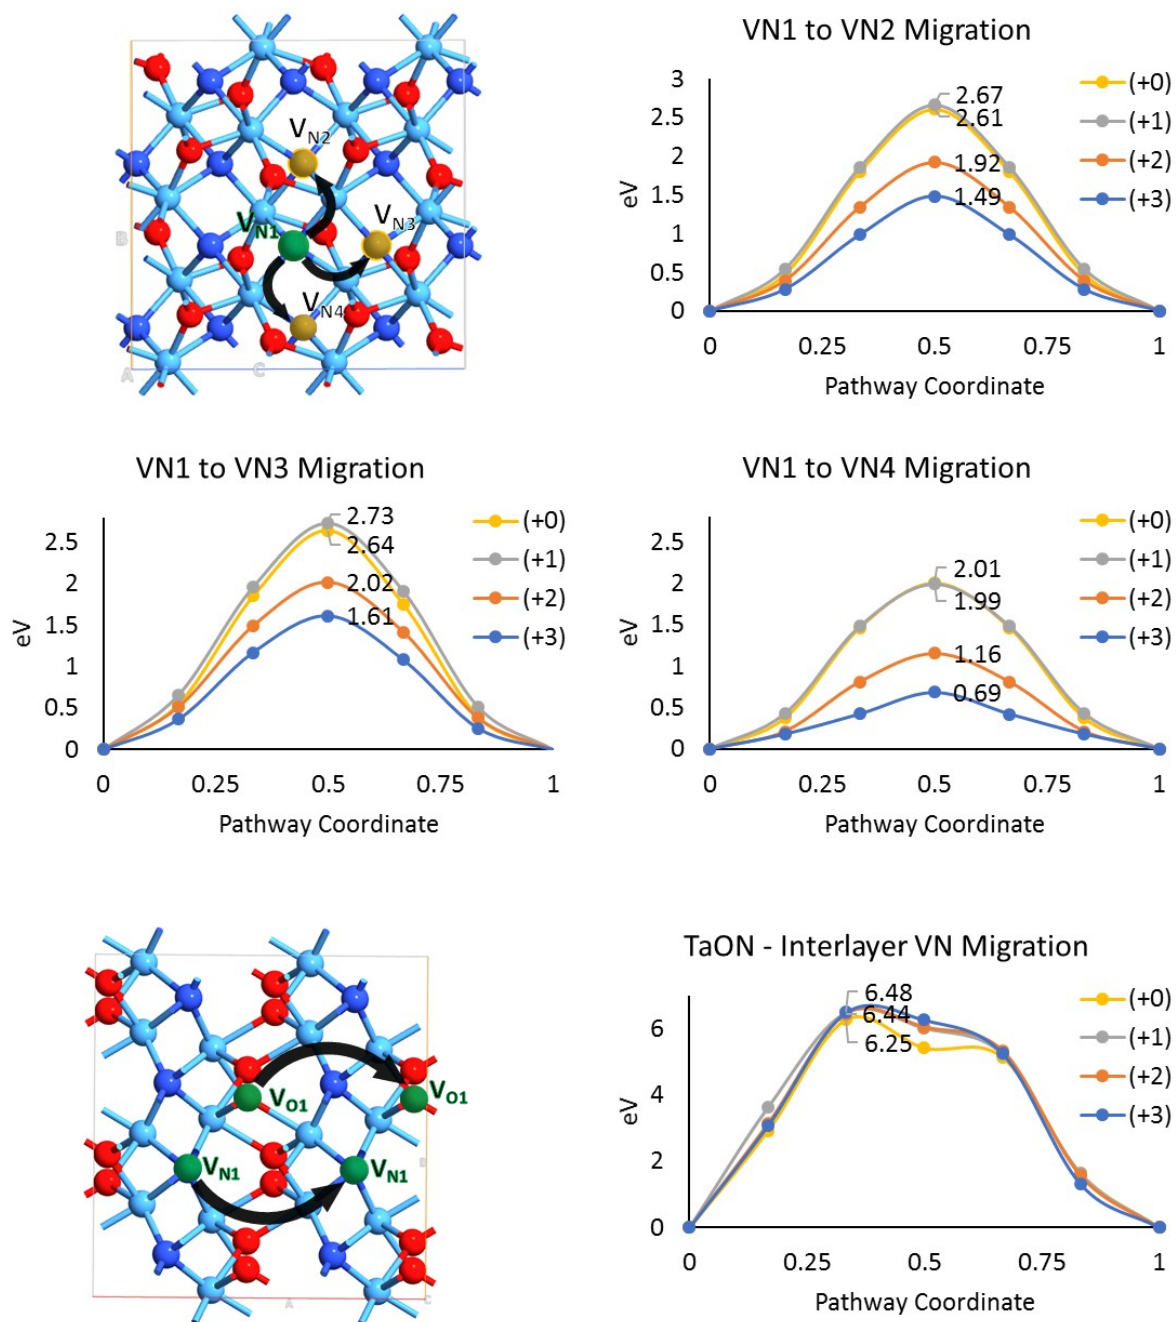

**Figure S2.** NEB Pathways corresponding to diffusion barriers reported in Figure 2.(b).

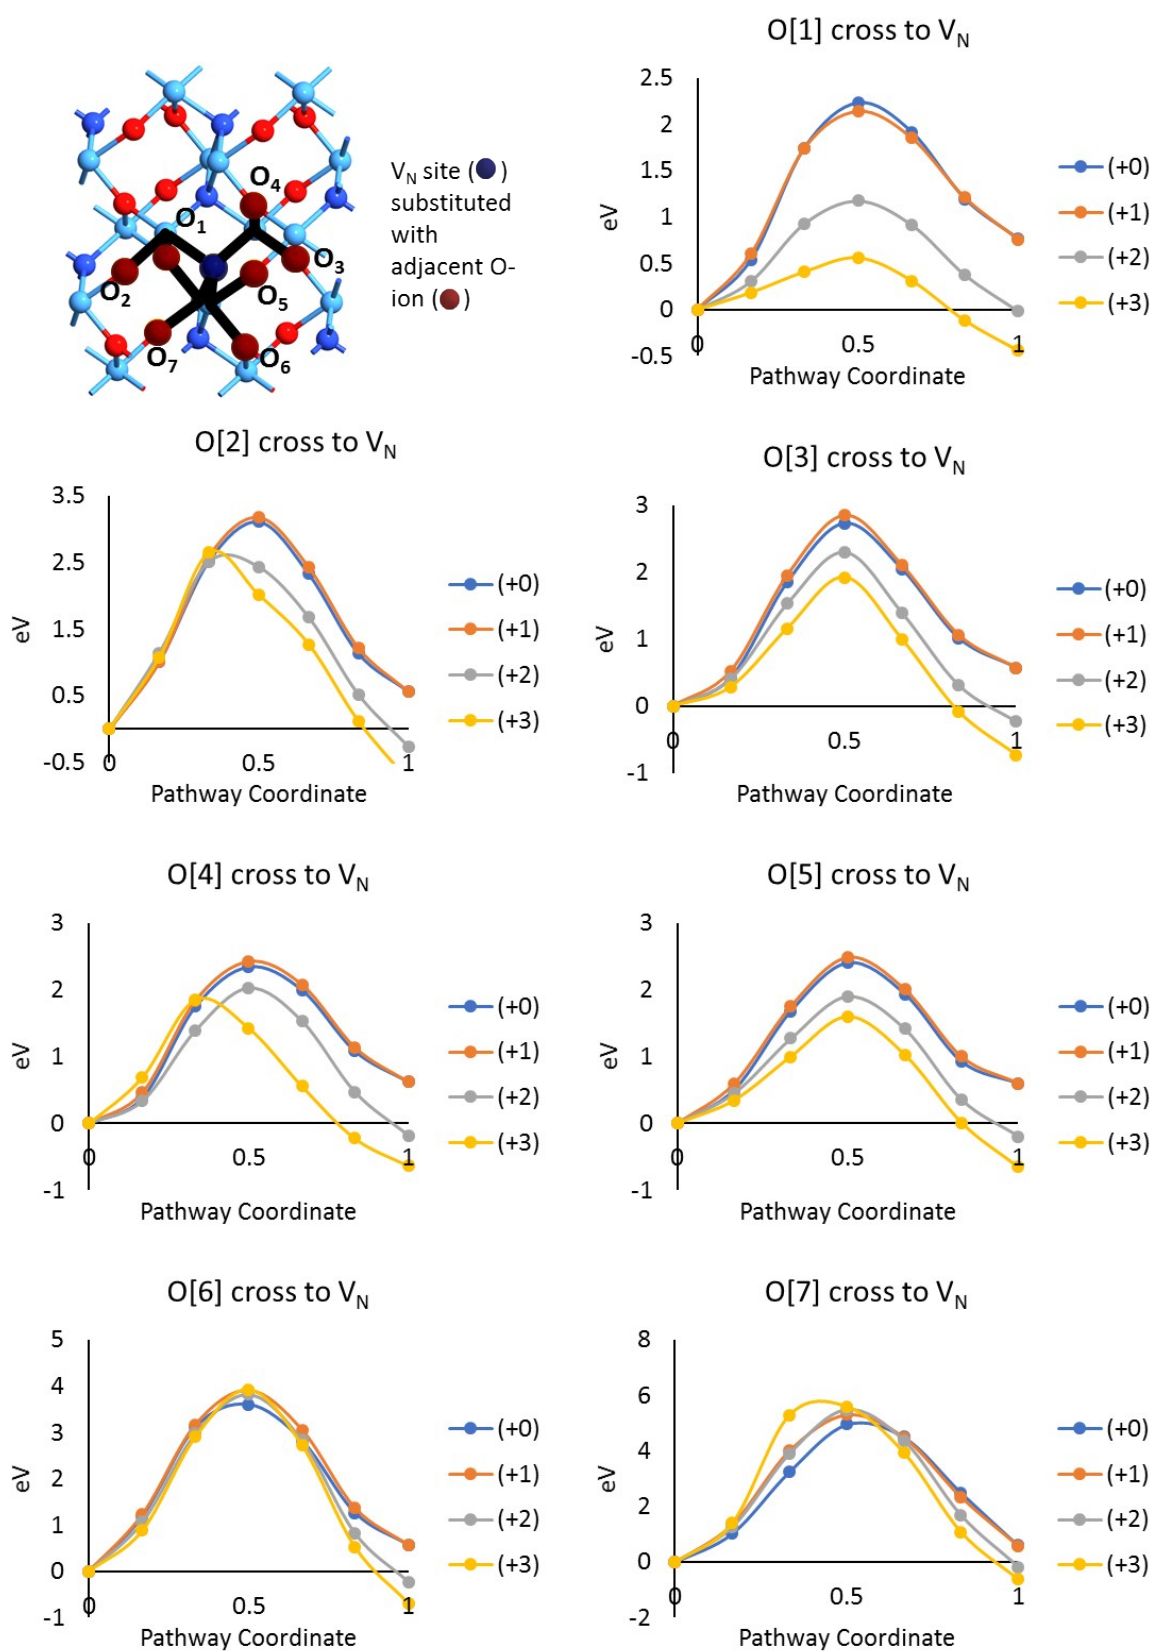

**Figure S3.** NEB Pathways corresponding to diffusion barriers reported in Figure 3.

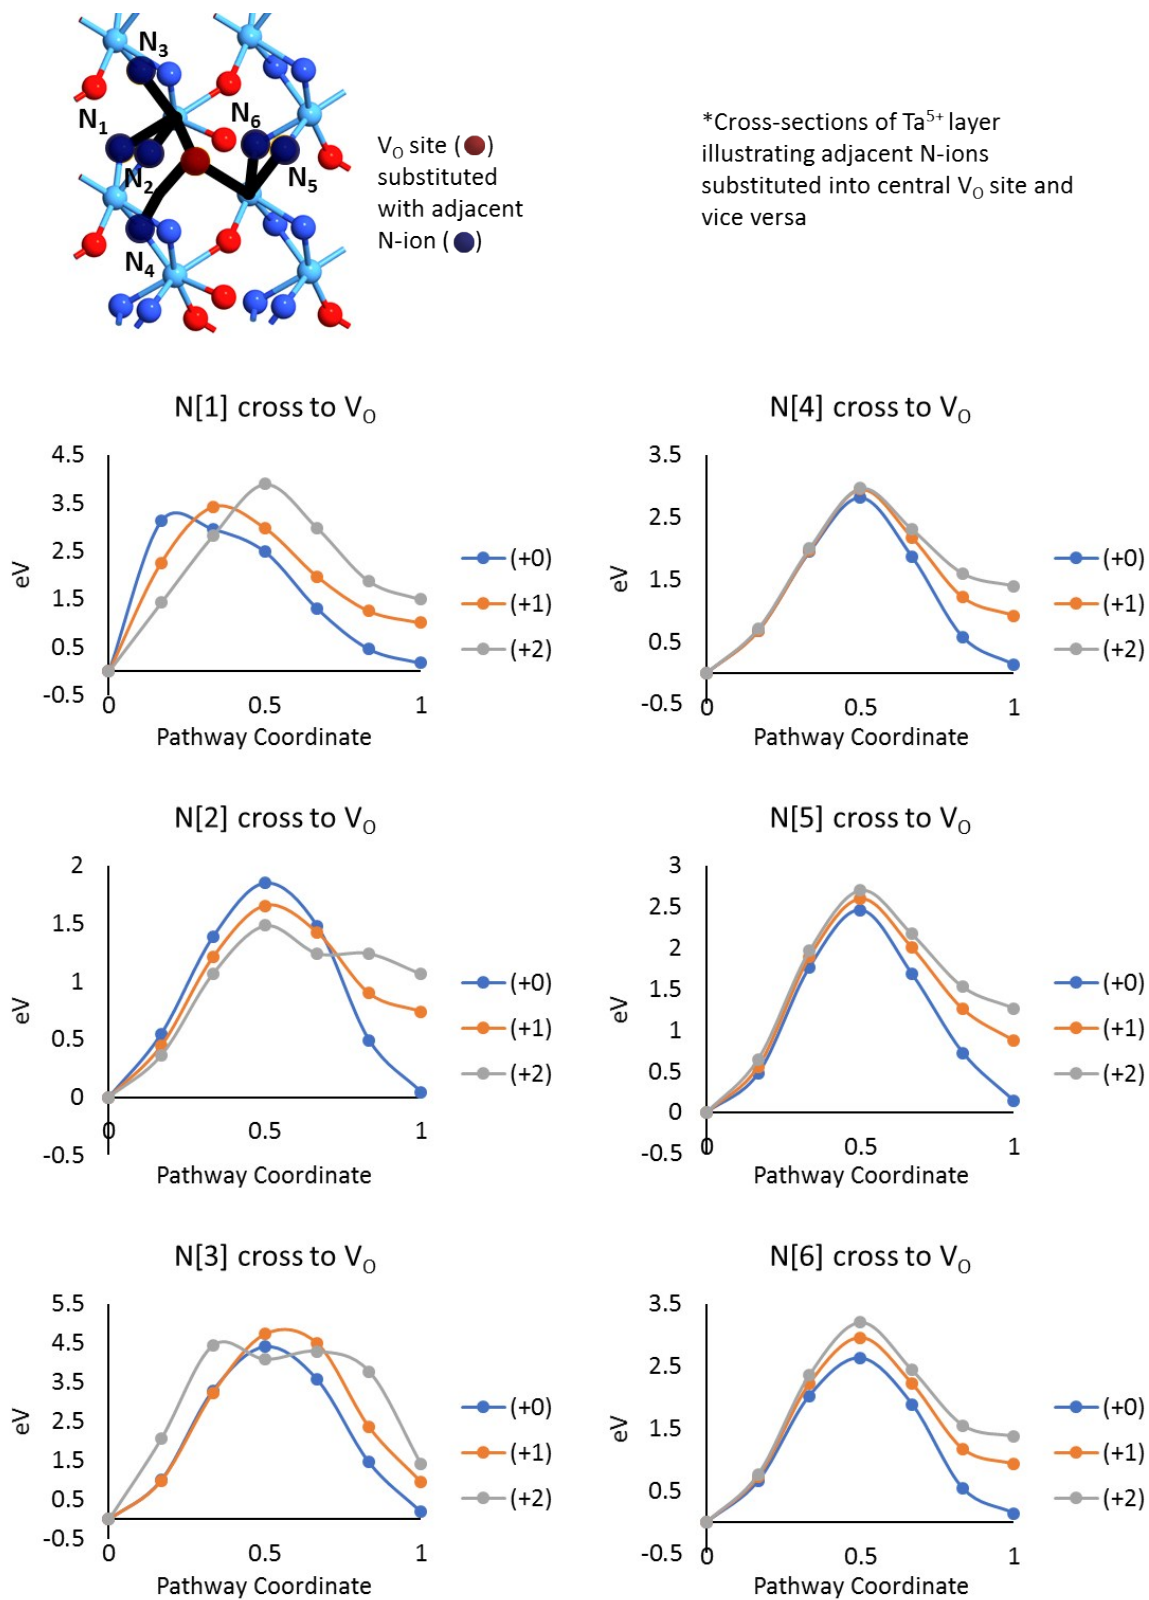

**Figure S4.** NEB Pathways corresponding to diffusion barriers reported in Figure 4.



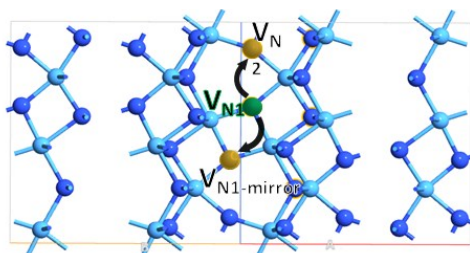

- between 3-coordinate N's

VN1a to VN1b

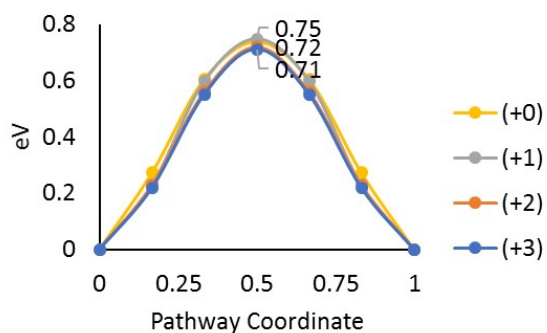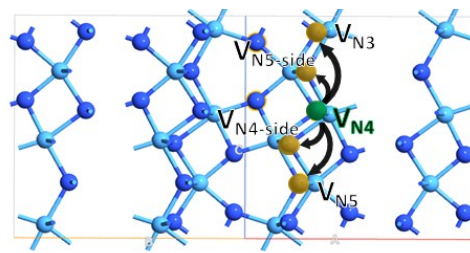

VN1 to VN2

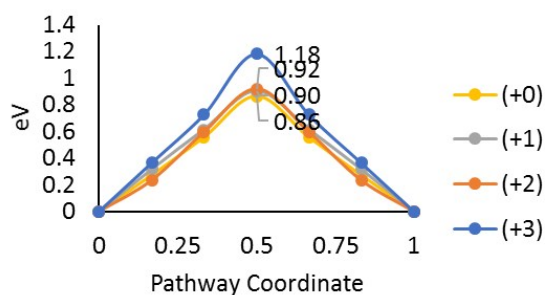

- between 4-coordinate N's

VN4 to VN3 Migration

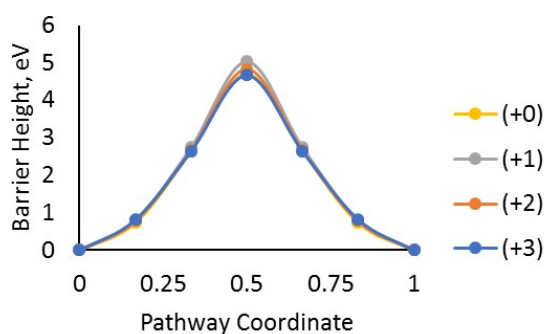

VN4 to VN5-side

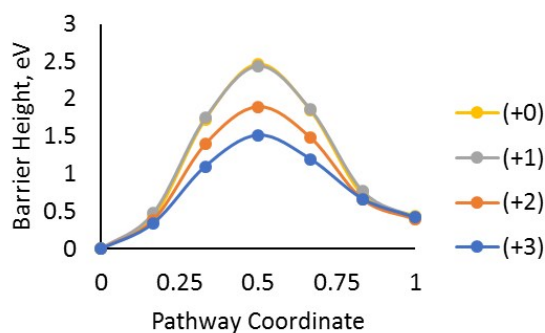

VN4 to VN4-side

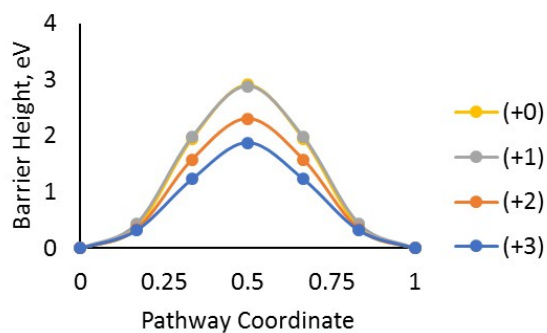

VN4 to VN5

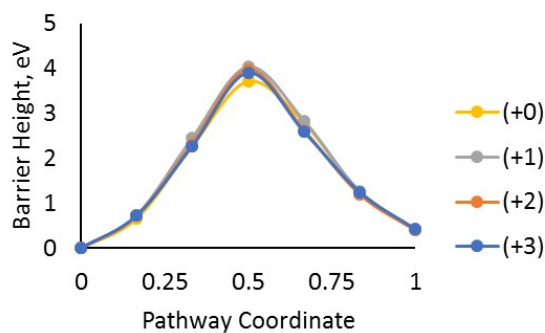

**Figure S5.** NEB Pathways corresponding to diffusion barriers reported in Figure 5.(a) &(b)

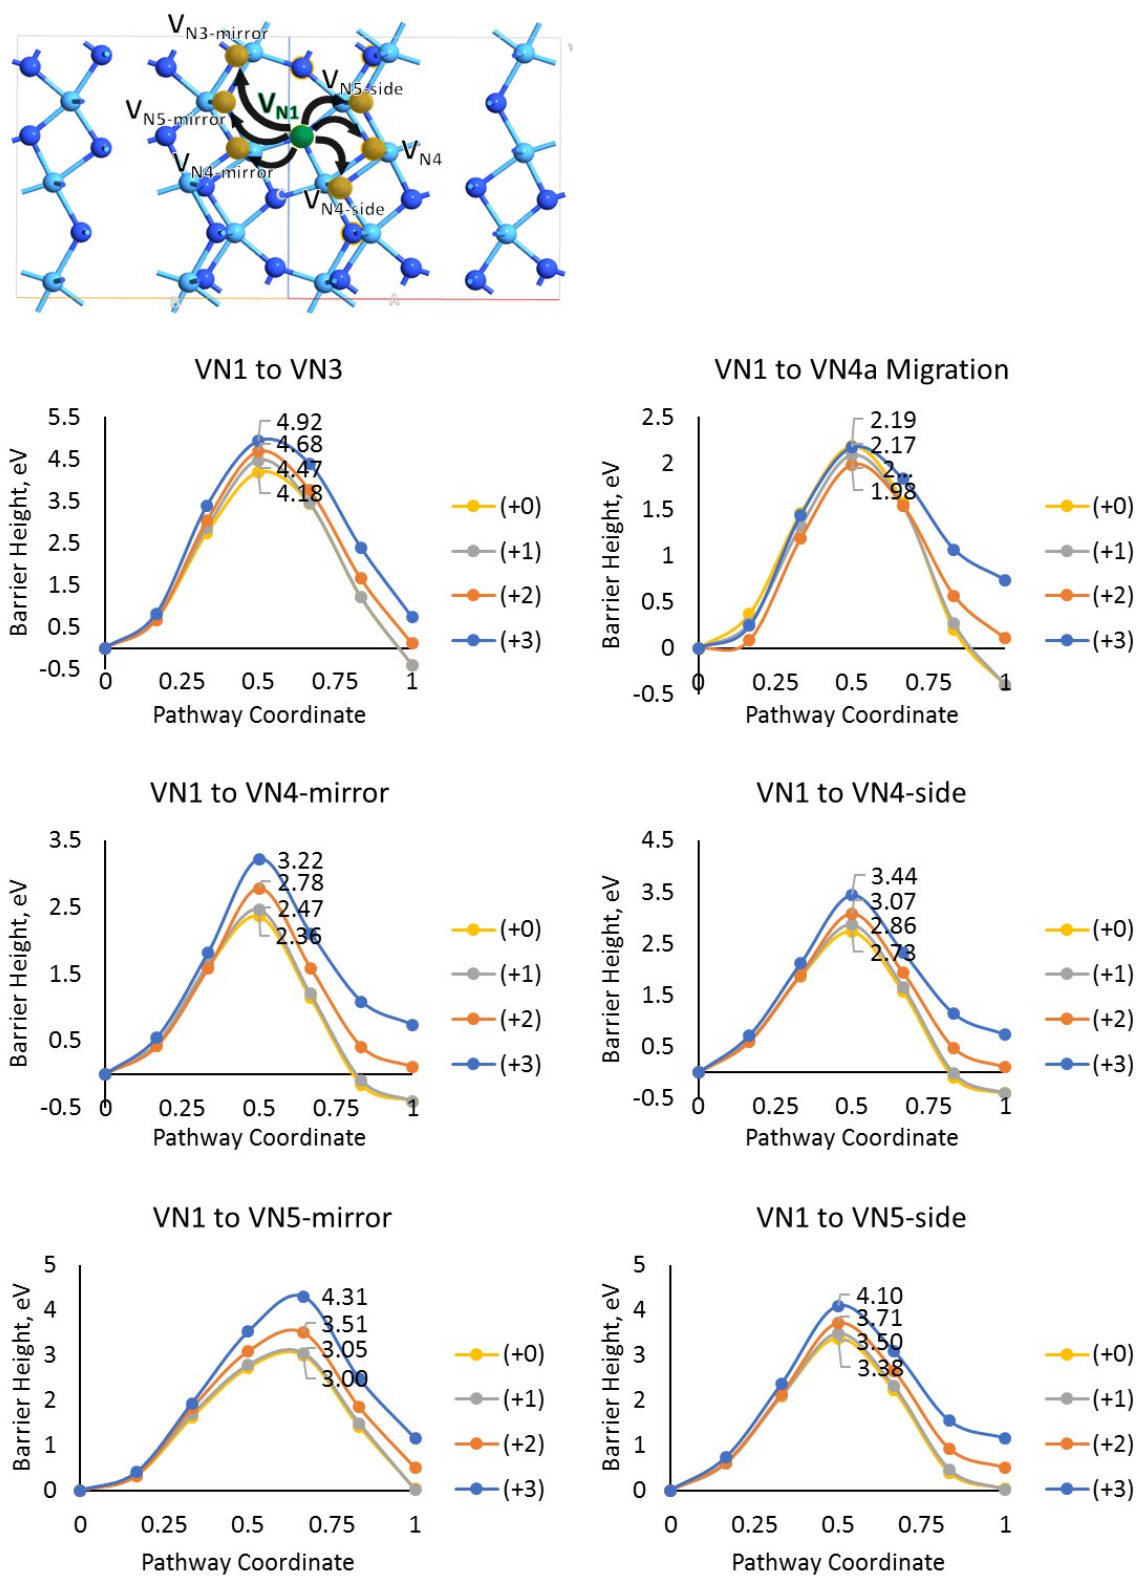

**Figure S6.** NEB Pathways corresponding to diffusion barriers reported in Figure 5.(c)

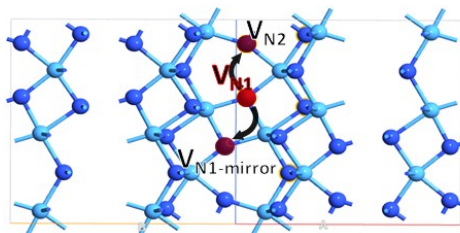

- between 3-coordinate N's

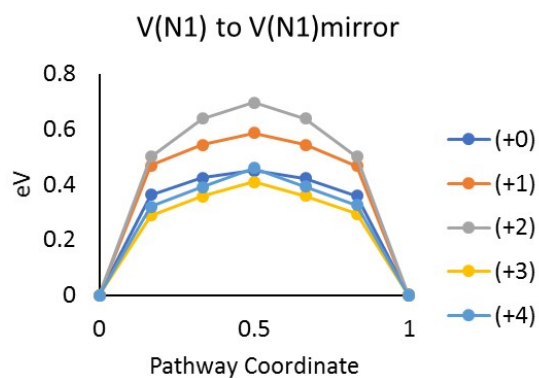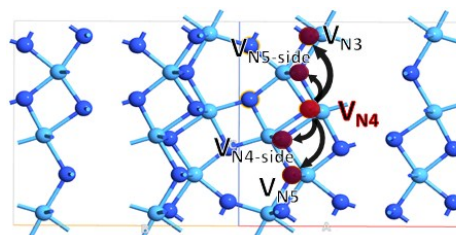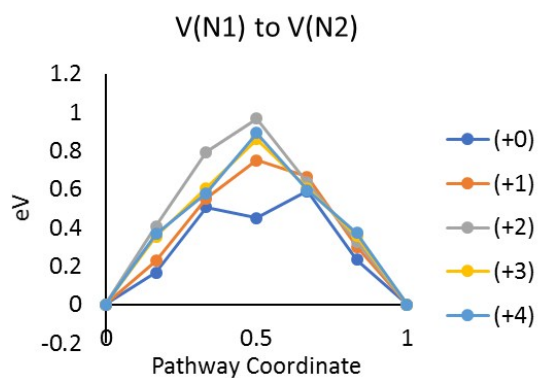

- between 4-coordinate N's

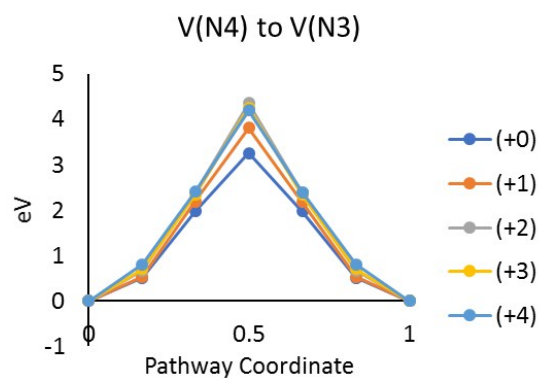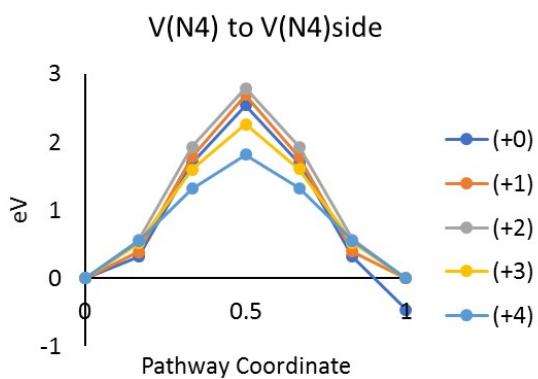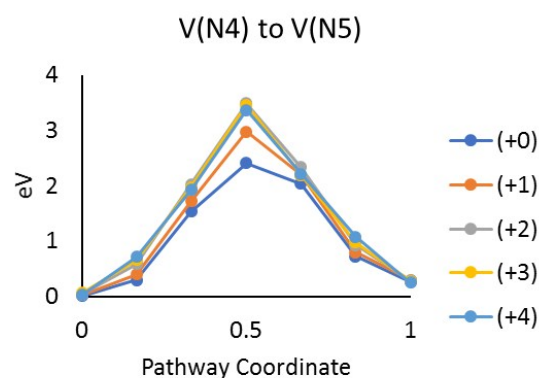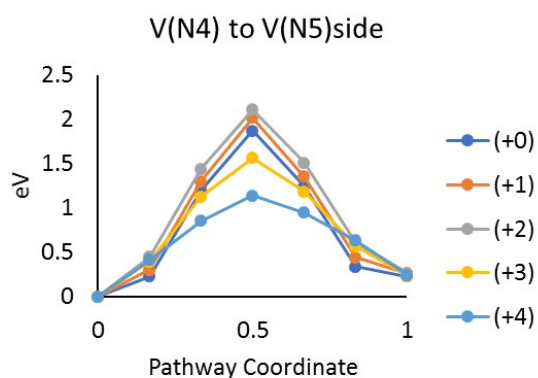

**Figure S7.** NEB Pathways corresponding to diffusion barriers reported in Figure 6.(a) &(b)



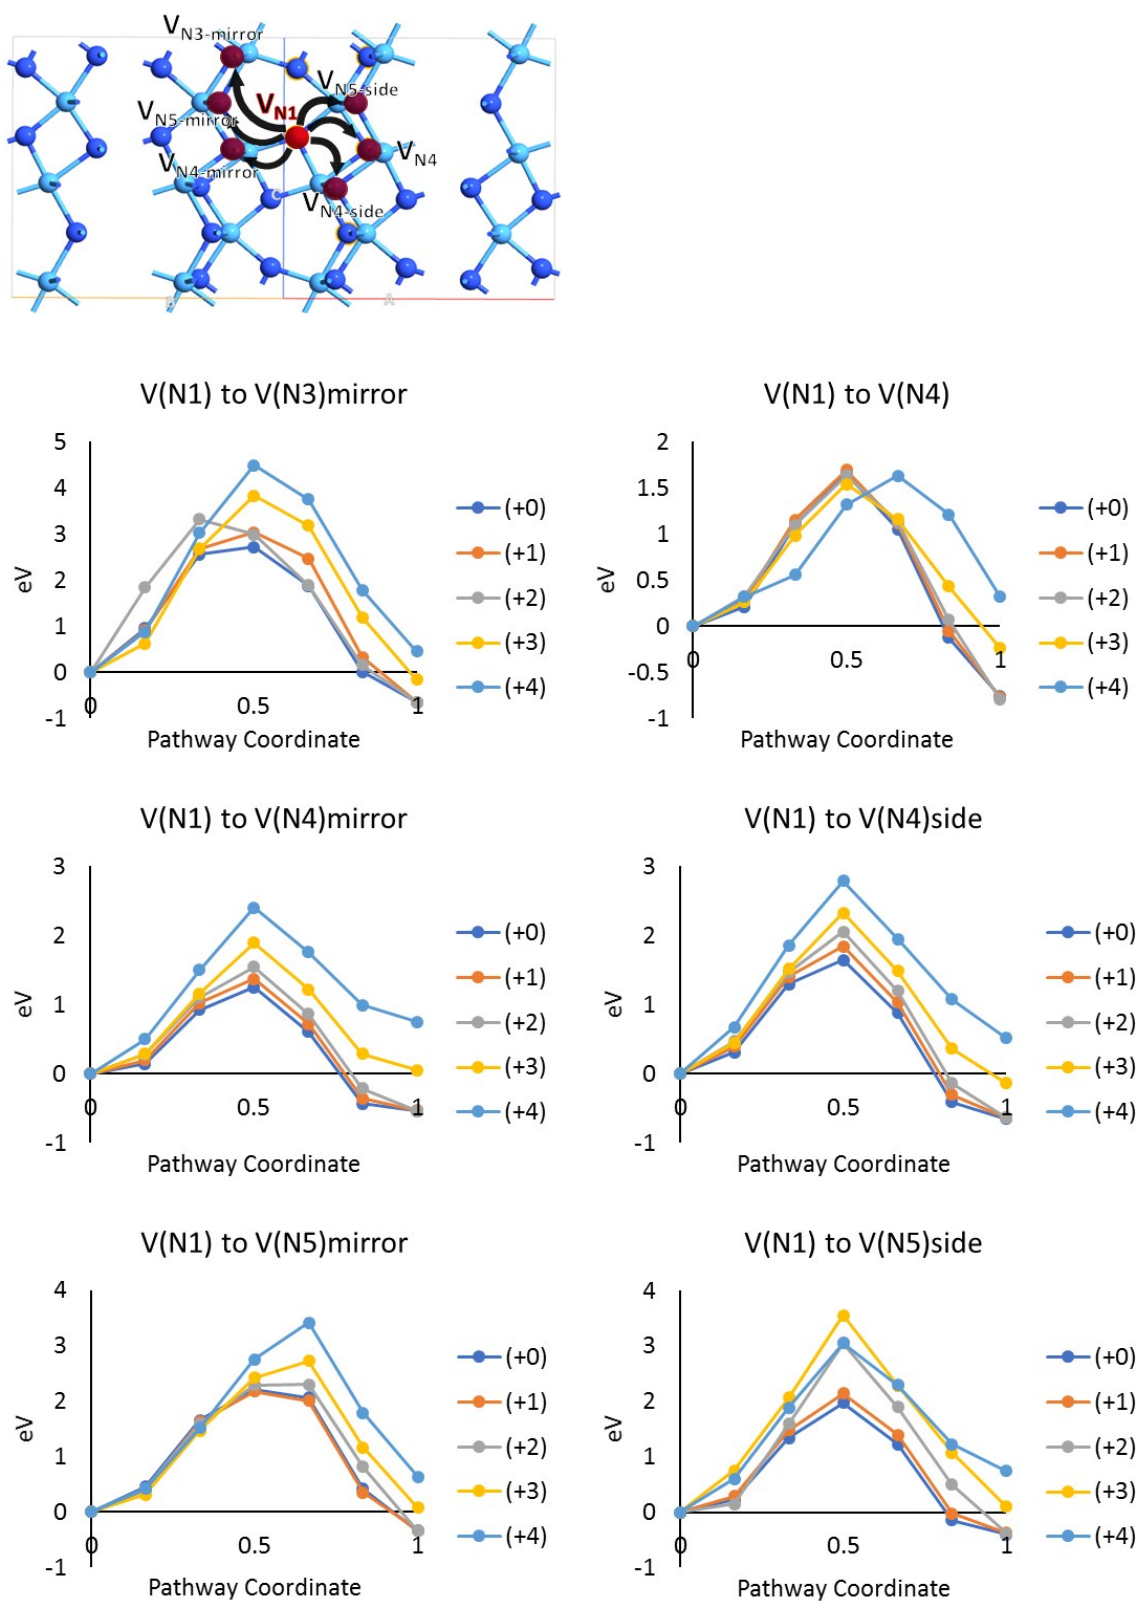

**Figure S8.** NEB Pathways corresponding to diffusion barriers reported in Figure 6.(c)
